# Supplementary material
Source: MDPI journal article supplement (https://www.mdpi.com/2673-8449/2/3/15)
Supplement: s1 [file s1]

## Changes in SpO2 on room air for 34 severe COVID-19 patients after ivermectin-based combination treatment: 62% normalization within 24 hours

**Supplementary Table S1. Changes in SpO2 for 34 COVID-19 patients treated with IVM, doxycycline and zinc.** For the elapsed times of x=12, 24, and 48 hours after first IVM dose, the SpO2 value shown for a given patient is that at the latest post-treatment time  $\leq x$ . All pre-treatment SpO2 values are from within one hour before treatment. These values are as graphed in Figures 1, 2 and 3.

| Age | Sex | SpO2 (%)      |              |              |              |
|-----|-----|---------------|--------------|--------------|--------------|
|     |     | Pre-treatment | at +12 hours | at +24 hours | at +48 hours |
| 25  | M   | 79            | 92           | 93           | 93           |
| 32  | F   | 88            | 95           | 95           | 95           |
| 35  | M   | 87            | 95           | 95           | 95           |
| 37  | M   | 92            | 99           | 99           | 98           |
| 38  | F   | 76            | 88           | 89           | 91           |
| 40  | F   | 93            | -            | 99           | 99           |
| 42  | M   | 90            | 90           | 90           | 93           |
| 44  | F   | 89            | 93           | 93           | 93           |
| 44  | M   | 87            | 93           | 93           | 94           |
| 45  | M   | 83            | 96           | 95           | 95           |
| 49  | F   | 66            | 90           | 90           | 90           |
| 50  | F   | 89            | 93           | 93           | 93           |
| 50  | M   | 92            | -            | 95           | 95           |
| 52  | F   | 90            | 93           | 93           | 93           |
| 55  | F   | 82            | -            | -            | 91           |
| 55  | M   | 81            | -            | 88           | 92           |
| 56  | F   | 87            | 93           | 94           | 94           |
| 57  | F   | 84            | -            | 89           | 88           |
| 58  | M   | 85            | 94           | 94           | 94           |
| 58  | M   | 89            | 95           | 95           | 95           |
| 59  | M   | 79            | 82           | 85           | 85           |
| 59  | M   | 92            | 93           | 93           | 93           |
| 61  | F   | 87            | -            | 98           | 99           |
| 61  | F   | 92            | -            | 96           | 96           |
| 62  | M   | 88            | 89           | 93           | 91           |
| 62  | M   | 91            | 94           | 94           | 94           |
| 66  | M   | 85            | 84           | 84           | 84           |
| 66  | M   | 88            | 94           | 94           | 94           |
| 68  | M   | 89            | 95           | 95           | 95           |
| 68  | M   | 90            | -            | 96           | 96           |
| 71  | F   | 89            | -            | 94           | 95           |
| 75  | M   | 80            | 92           | 90           | 90           |
| 80  | F   | 85            | 91           | 91           | 91           |
| ≥90 | M   | 88            | 95           | 98           | 98           |

**Supplementary Table S2. Changes in SpO2 for 19 COVID-19 patients treated with IVM, doxycycline and zinc as reported by Hazan et al., 2022 [1].** The data shown are for the 19 of 24 patients who had SpO2 values recorded within 24 hours after first IVM dose, and whose pre-treatment SpO2 was  $\leq 90\%$  (one patient with a pre-treatment SpO2 value of 97% was not included in the data shown).

| Age | Sex | SpO2 (%)      |                  |
|-----|-----|---------------|------------------|
|     |     | Pre-treatment | within +24 hours |
| 66  | M   | 90.0          | 94.0             |
| 62  | M   | 77.0          | 87.0             |
| 75  | M   | 88.0          | 96.0             |
| 66  | F   | 89.0          | 95.0             |
| 43  | F   | 88.0          | 94.0             |
| 62  | M   | 86.5          | 91.0             |
| 57  | M   | 88.0          | 96.0             |
| 94  | F   | 88.0          | 94.0             |
| 63  | F   | 90.0          | 96.0             |
| 47  | M   | 84.0          | 91.0             |
| 69  | F   | 88.0          | 91.0             |
| 69  | M   | 88.0          | 91.0             |
| 46  | F   | 87.0          | 94.0             |
| 86  | M   | 88.0          | 95.0             |
| 59  | F   | 90.0          | 95.0             |
| 92  | M   | 85.0          | 91.0             |
| 63  | M   | 90.0          | 96.0             |
| 57  | M   | 73.0          | 90.0             |
| 87  | M   | 90.0          | 95.0             |

## References

1. Hazan, S.; Dave, S.; Gunaratne, A.W.; Dolai, S.; Clancy, R.L.; McCullough, P.A.; Borody, T.J. Effectiveness of ivermectin-based multidrug therapy in severely hypoxic, ambulatory COVID-19 patients. *Future Microbiology* **2022**, 10.2217/fmb-2022-0014.
